# Supplementary material for: Diels–Alder reactions of 1,1,4,4-tetrafluorobutatriene
Source: Royal Society of Chemistry journal article supplement (doi:10.1039/b922424f), 2010-01-01
Supplement: b922424f.pdf [file b922424f.pdf]

## Supplementary Information

### NMR Data:

**3b:**  $\delta_F$ (CDCl<sub>3</sub>, CFCl<sub>3</sub> ref.): -85.9 (2F, m), -86.4 (2F, m);  $\delta_H$ (C<sub>6</sub>D<sub>6</sub>): 6.57 (2H, dd, 1.0,1.0 ), 5.48 (2H, m);  $\delta_C$ (CDCl<sub>3</sub>): 153.5 (2C, m, CF<sub>2</sub>), 135.7 (2C), 88.1 (2C), 78.8 (2C)

**3c:**  $\delta_F$ (CDCl<sub>3</sub>, CFCl<sub>3</sub> ref.): -82.4 (2F, m), -88.2 (2F, m);  $\delta_H$ (CDCl<sub>3</sub>): 6.32 (2H, s), 2.38 (6H, s),  $\delta_C$ (CDCl<sub>3</sub>): 152.5 (2C, m, CF<sub>2</sub>), 140.7 (2C), 95.0 (2C, m), 87,8 (2C), 95.5 (2C, m, C=CF<sub>2</sub>), 17.0 (2C)

**3d:**  $\delta_F$ (neat, CFCl<sub>3</sub> ref.): -85.9 (2F, m), -87.4 (2F, m)

**3e:**  $\delta_F$ (neat, CFCl<sub>3</sub> ref.): -85.5 (2F, m), -92.5 (2F, m)

**3f:**  $\delta_F$ (neat, CFCl<sub>3</sub> ref.): Isomer 1: -78.1 (2F, m), -89.0 (2F, m) Isomer 2 (minor) -75.6 (2F, m), -90.7 (2F, m); Isomer ratio 3.8:1

**3g:**  $\delta_F$ (CDCl<sub>3</sub>, CFCl<sub>3</sub> ref.): -81.6 (2F, m), -88.3 (2F, m);  $\delta_C$ (CDCl<sub>3</sub>): 150.8 (2C, m, CF<sub>2</sub>), 132.8 (2C), 128.3 (2C), 127.5 (2C), 86.8 (2C, m, C=CF<sub>2</sub>), 42.5 (2C)

**3i:**  $\delta_F$ (neat CFCl<sub>3</sub> ref.): -84.6 (2F, m), -91.5 (2F, m)

**3j:**  $\delta_F$ (neat, CFCl<sub>3</sub> ref.): -86.8 (2F, m), -88.6 (2F, m)

**3k:**  $\delta_F$ (neat, CFCl<sub>3</sub> ref.): -86.9.0 (2F, m), -88.9 (2F, m)
